# Supplementary material
Source: bioRxiv or medRxiv preprint supplement (http://medrxiv.stage.highwire.org/highwire/filestream/84483/field_highwire_adjunct_files/1/2020.06.03.20118570-2.pdf)
Supplement: Supplementary file [file 2020.06.03.20118570-2.pdf]

GO:0071352  
(cellular response to interleukin-2)

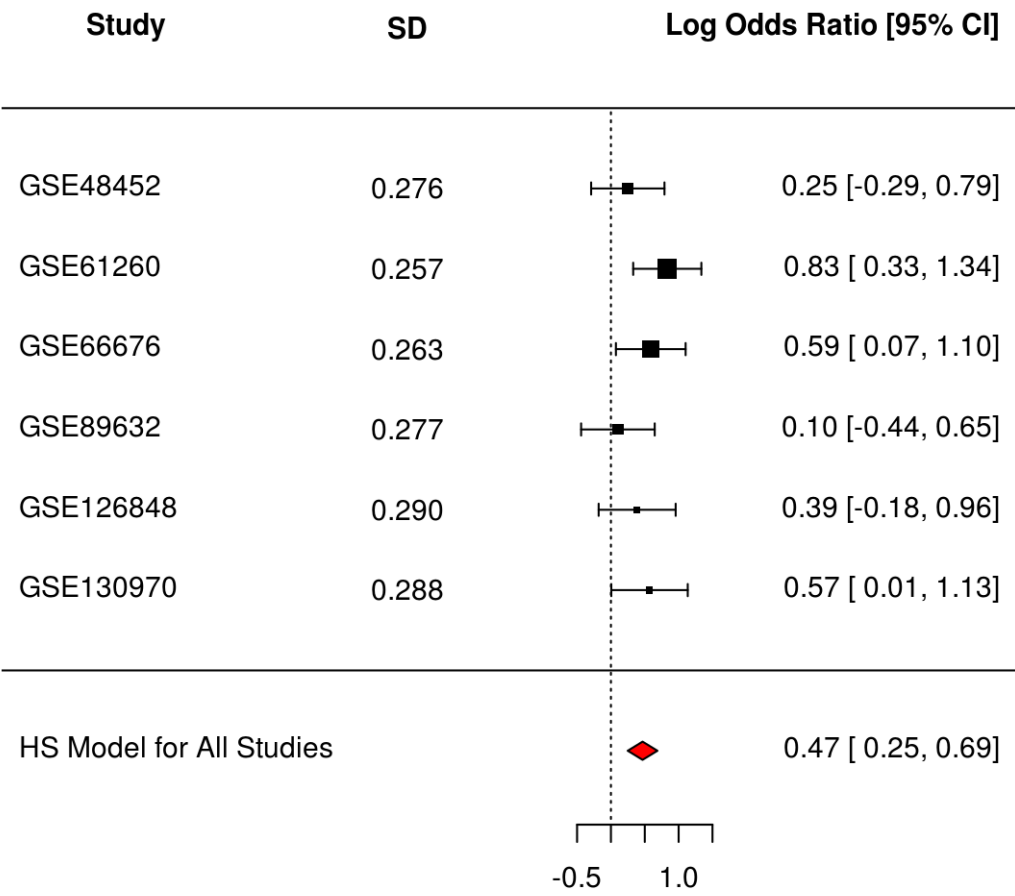

GO:0090177  
(establishment of planar polarity involved in neural tube closure)

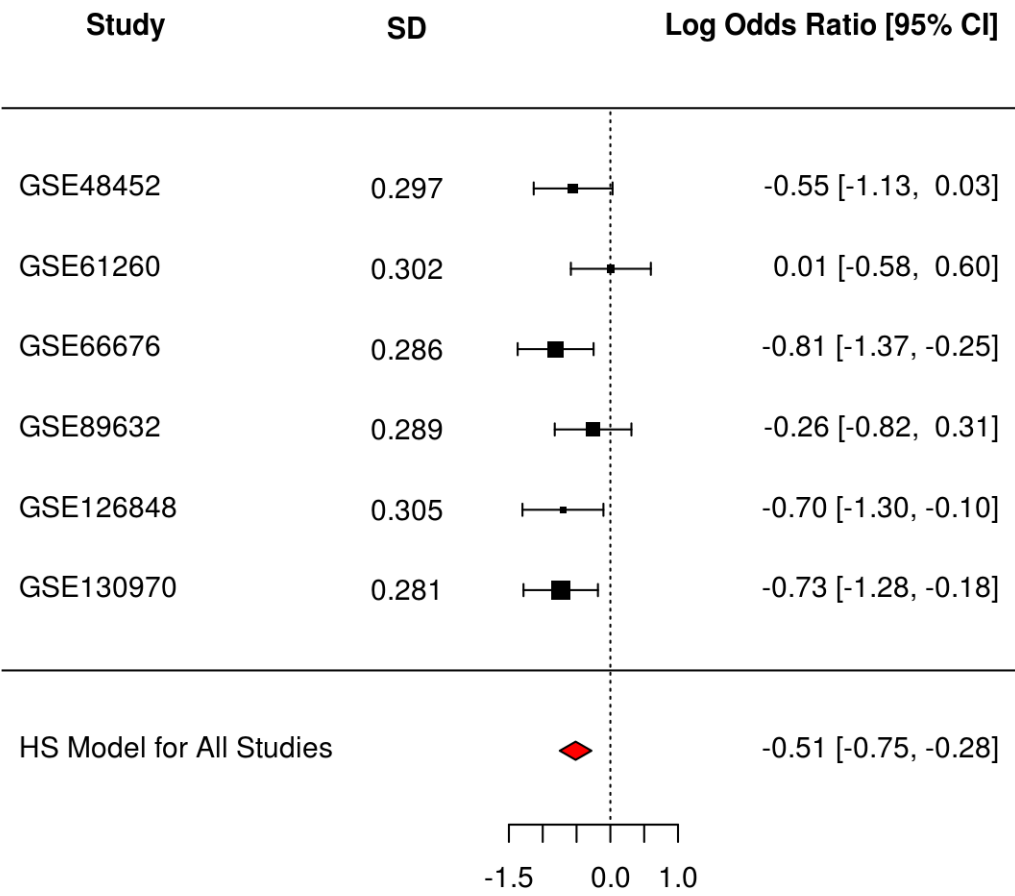

GO:1900165  
(negative regulation of interleukin-6 secretion)

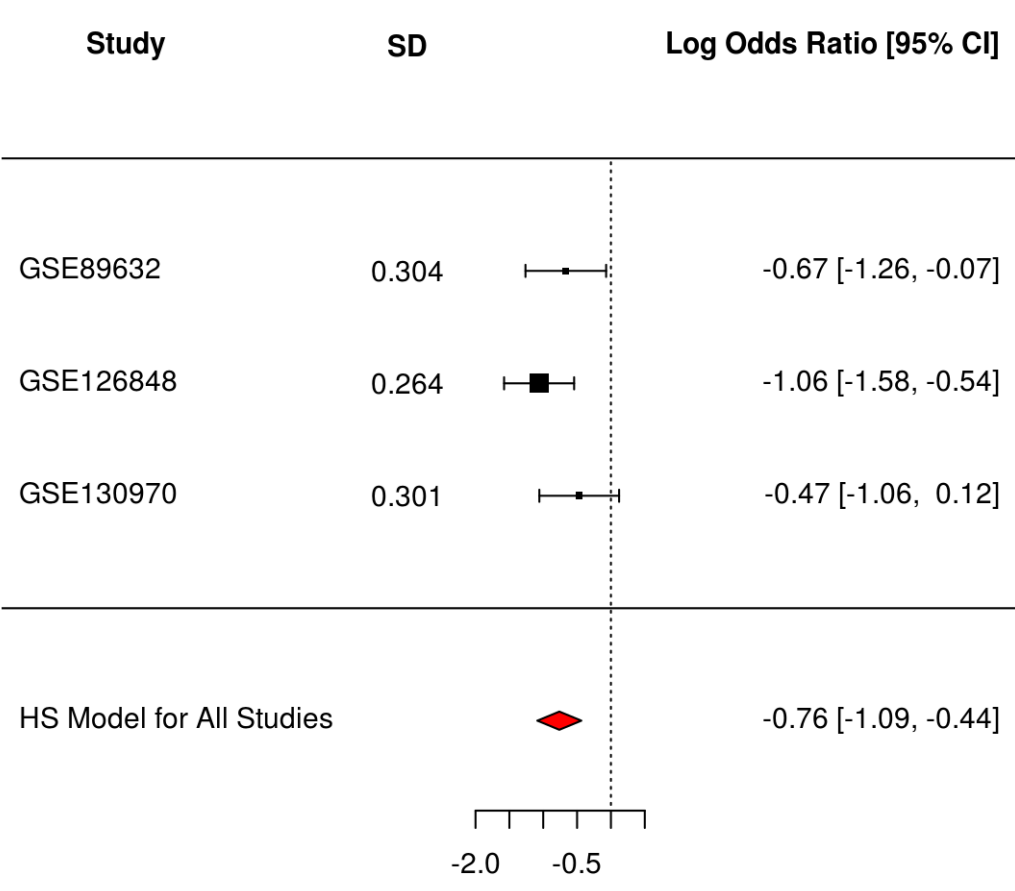

GO:1901215  
(negative regulation of neuron death)

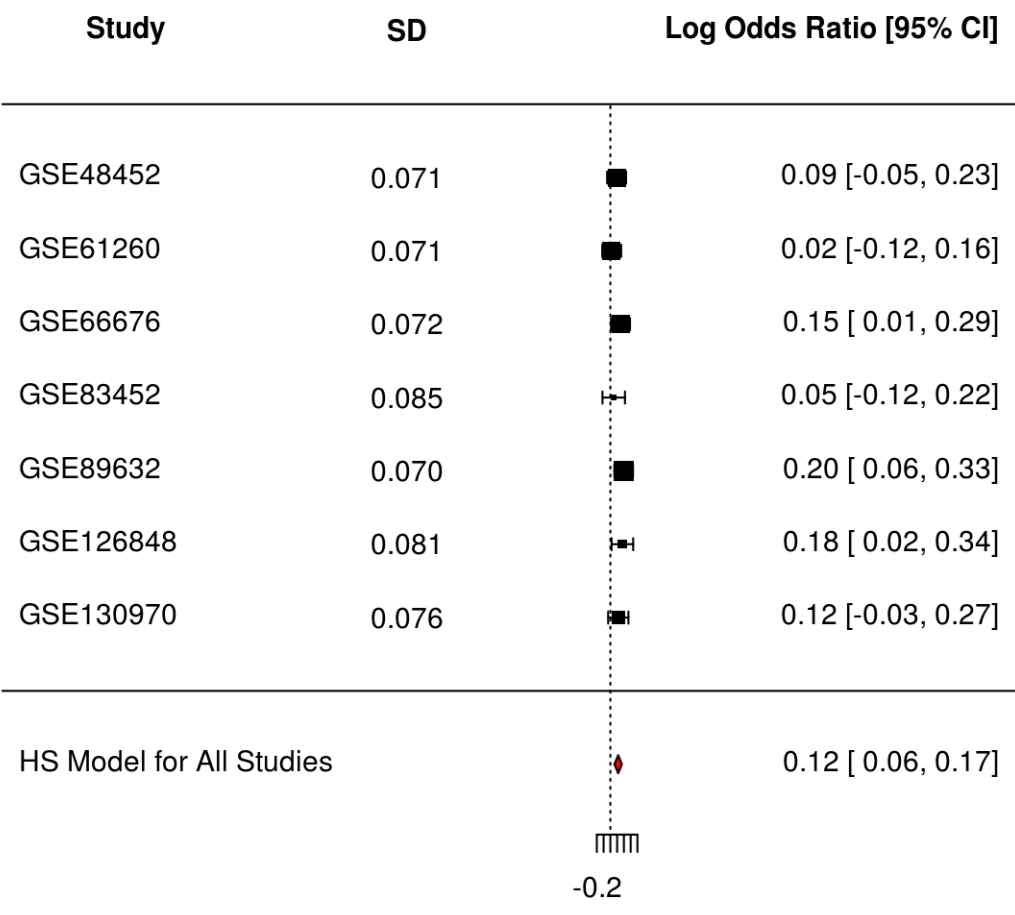

GO:0090178  
(regulation of establishment of planar polarity involved in n...)

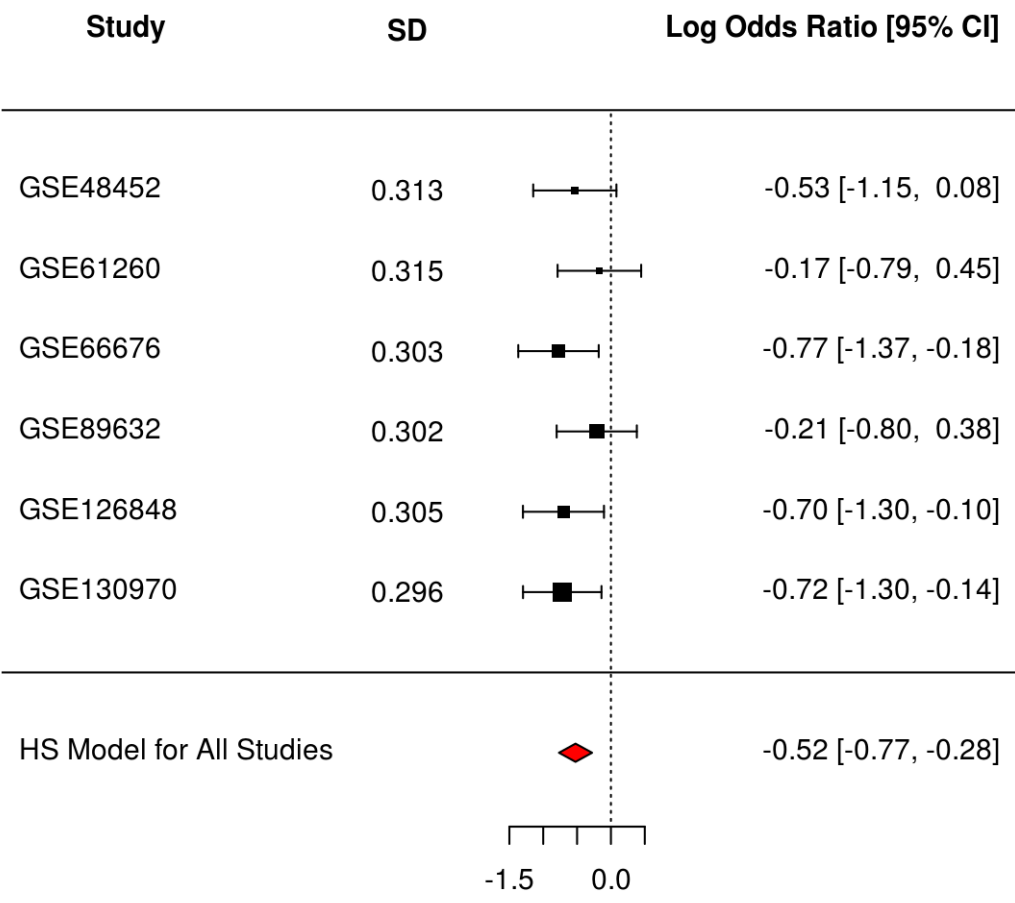

GO:0070669  
(response to interleukin-2)

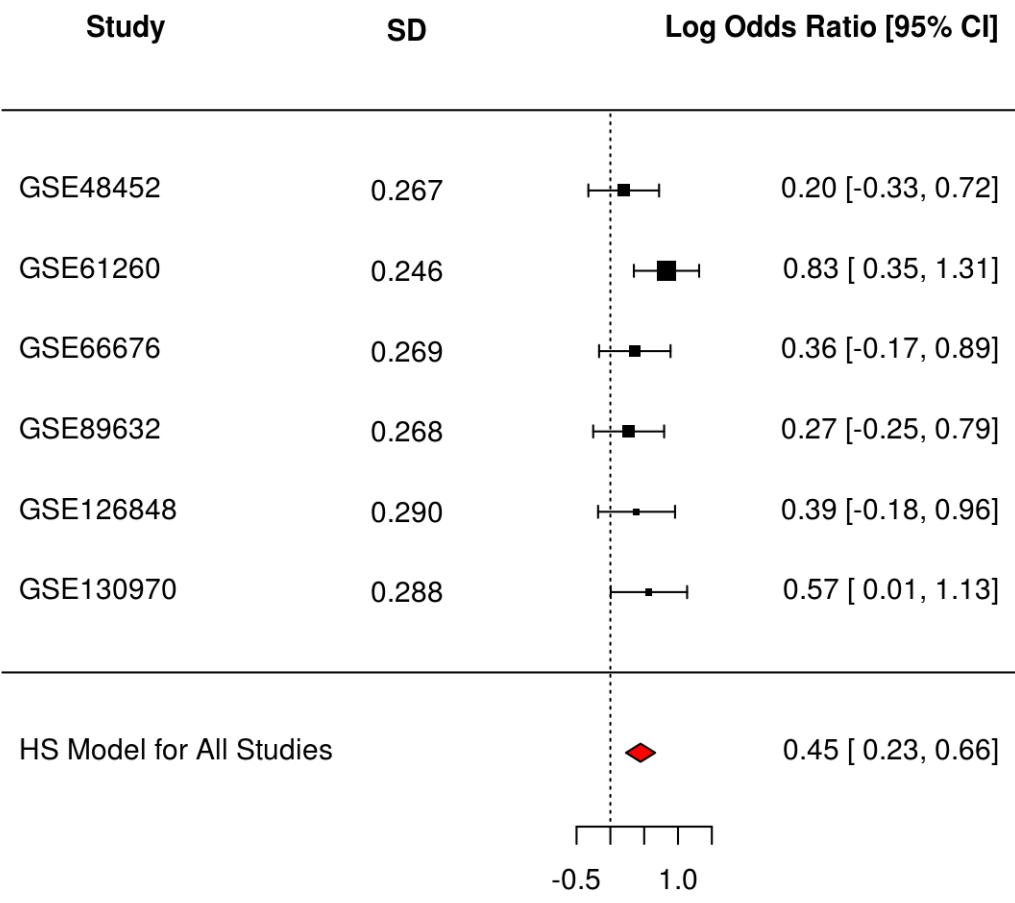

GO:0001012  
(RNA polymerase II regulatory region DNA binding)

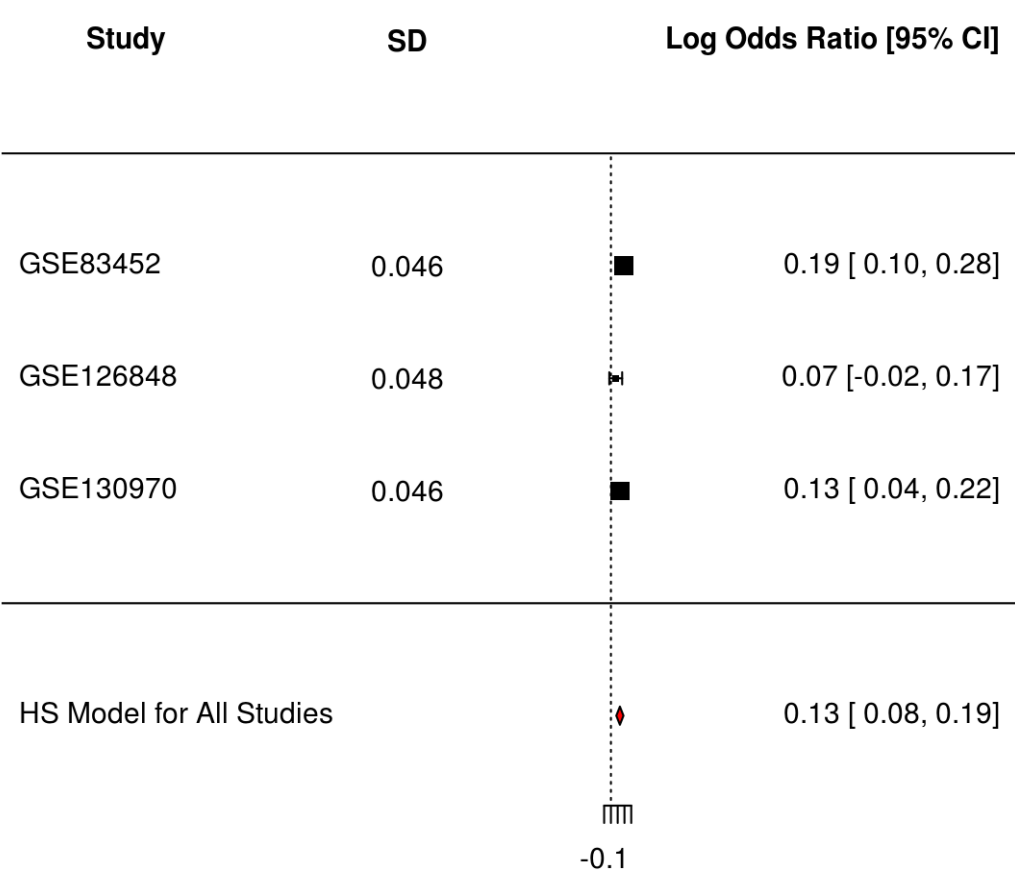

GO:0000977  
(RNA polymerase II regulatory region sequence-specific DNA bi...)

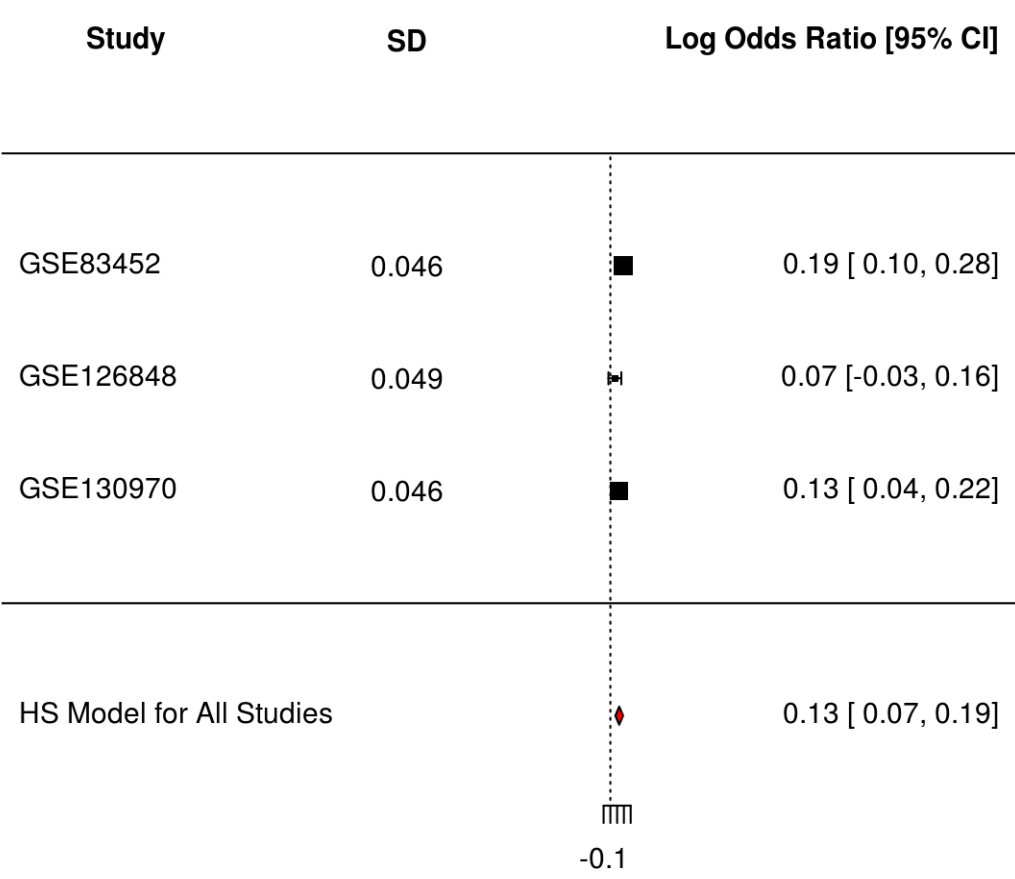

GO:0017166  
(vinculin binding)

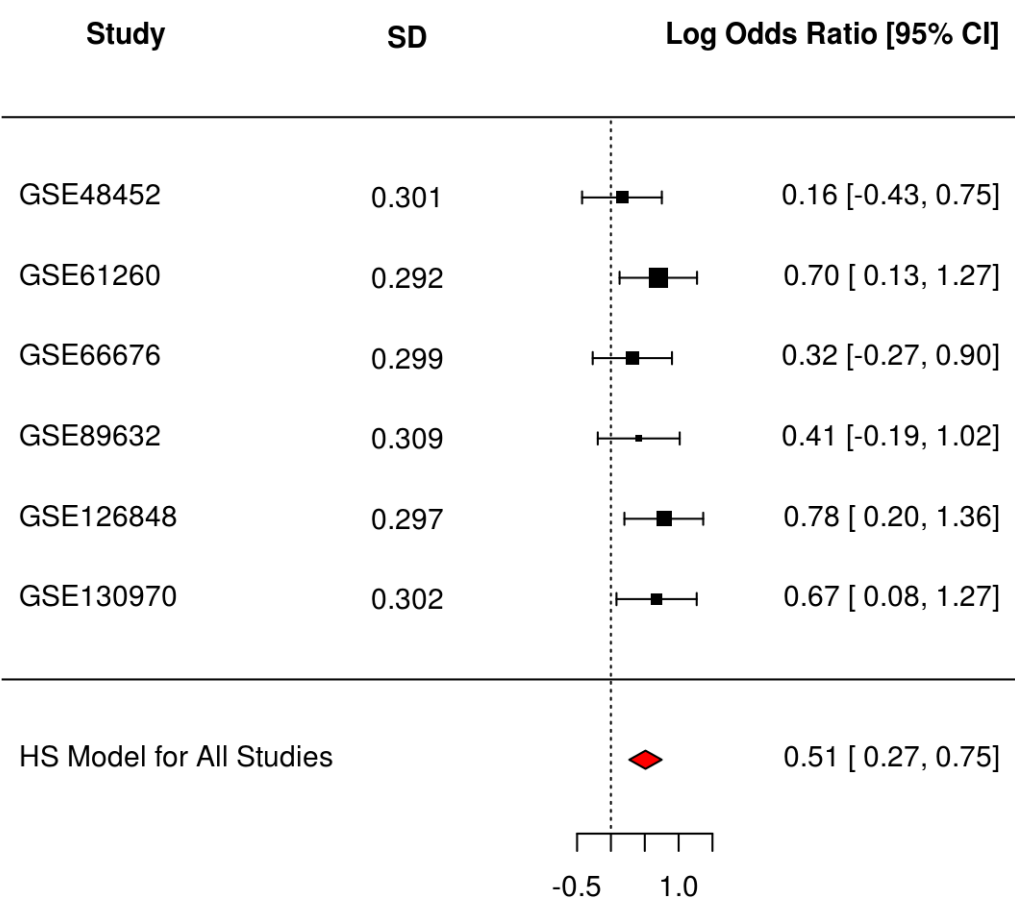

Supplementary Figure 2. Forest plots for significant GO terms from our functional gene meta-analysis.
